# Supplementary material for: Targeting SLC7A11-mediated cysteine metabolism for the treatment of trastuzumab-resistant HER2-positive breast cancer
Source: eLife journal article supplement (doi:10.7554/elife.103953), 2025-02-05
Supplement: fig2-data1 [file elife-103953-fig2-data1-v1.zip]

JIMT1 SKBR3

35 kDa  
25 kDa  
15 kDa

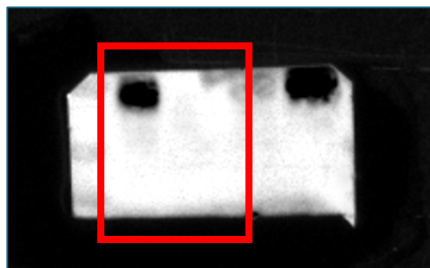

SLC7A11

JIMT1 SKBR3

35 kDa  
25 kDa  
15 kDa

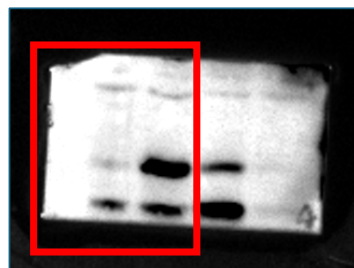

GPX4

JIMT1 SKBR3

55 kDa  
40 kDa

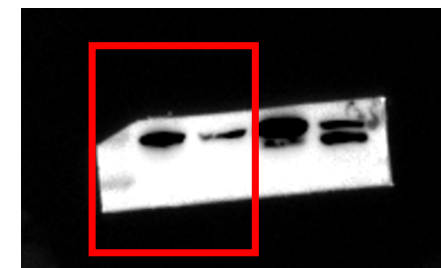

Glutathione Synthetase

JIMT1 SKBR3

70 kDa  
55 kDa

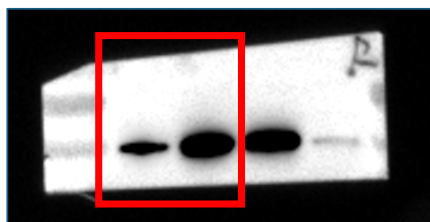

Glutathione Reductase

JIMT1 SKBR3

40 kDa  
35 kDa  
25 kDa

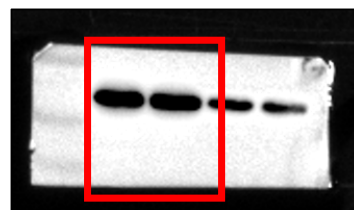

GAPDH
