# Supplementary material for: Targeting SLC7A11-mediated cysteine metabolism for the treatment of trastuzumab-resistant HER2-positive breast cancer
Source: eLife journal article supplement (doi:10.7554/elife.103953), 2025-02-05
Supplement: fig3-figsupp1-data1 [file elife-103953-fig3-figsupp1-data1-v1.zip]

SKBR3

si-NC  
si-SLC7A11-1  
si-SLC7A11-2

40 kDa  
35 kDa  
25 kDa

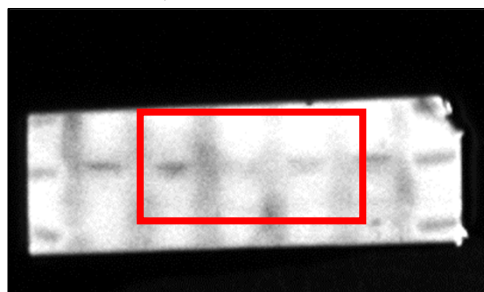

SLC7A11

40 kDa  
35 kDa  
25 kDa

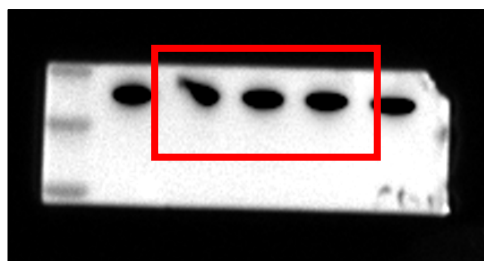

GAPDH

SKBR3

si-NC  
si-GPX4-1  
si-GPX4-2

25 kDa  
15 kDa  
10 kDa

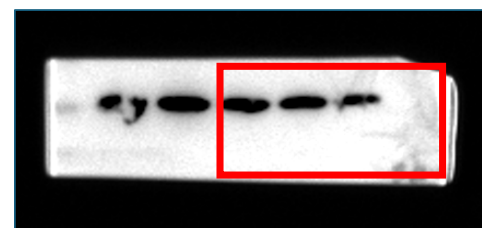

GPX4

40 kDa  
35 kDa  
25 kDa

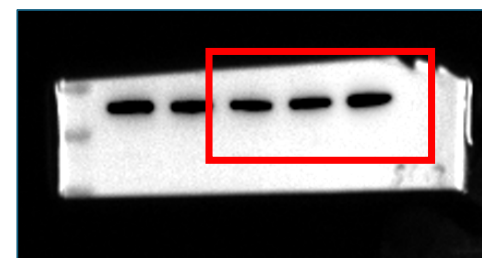

GAPDH
