# Supplementary material for: Targeting SLC7A11-mediated cysteine metabolism for the treatment of trastuzumab-resistant HER2-positive breast cancer
Source: eLife journal article supplement (doi:10.7554/elife.103953), 2025-02-05
Supplement: fig5-data1 [file elife-103953-fig5-data1-v1.zip]

si-NC  
si-ASH2L-1  
si-ASH2L-2

25 kDa  
15 kDa  
10 kDa

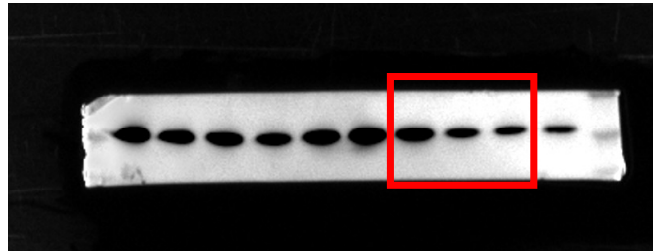

H3K4me3

25 kDa  
15 kDa  
10 kDa

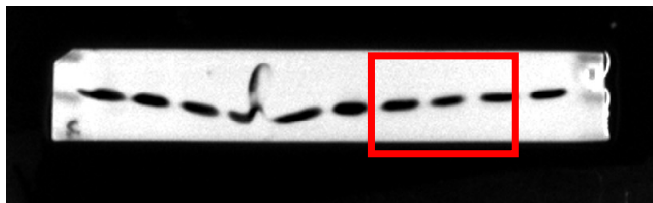

H3

si-NC  
si-ASH2L-1  
si-ASH2L-2

40 kDa  
35 kDa

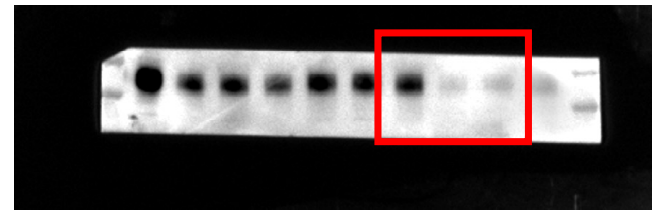

SLC7A11

100 kDa  
70 kDa

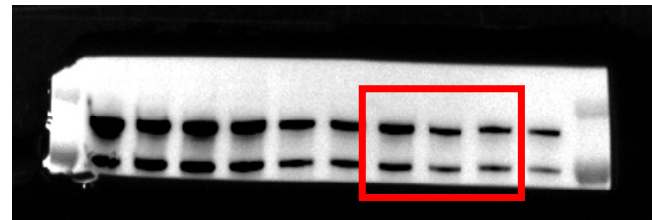

ASH2L

40 kDa  
35 kDa

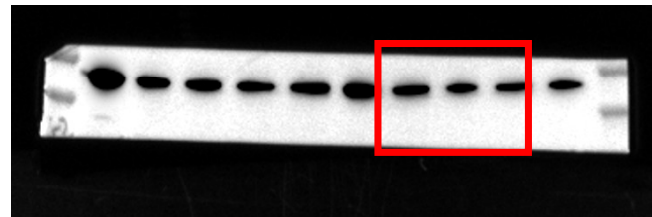

GAPDH
