# Supplementary material for: Targeting SLC7A11-mediated cysteine metabolism for the treatment of trastuzumab-resistant HER2-positive breast cancer
Source: eLife journal article supplement (doi:10.7554/elife.103953), 2025-02-05
Supplement: fig6-figsupp1-data1 [file elife-103953-fig6-figsupp1-data1-v1.zip]

200ng/μl 100ng/μl 50ng/μl

100ng/ $\mu$ l

50ng/ $\mu$ l

JIMT1

SKBR3

5-mC
