# Supplementary material for: Targeting SLC7A11-mediated cysteine metabolism for the treatment of trastuzumab-resistant HER2-positive breast cancer
Source: eLife. 2025 Jun 4;14:RP103953. doi: 10.7554/eLife.103953 (PMC12136593; doi:10.7554/eLife.103953)
Supplement: Figure 2—source data 3. [file elife-103953-fig2-data3.xlsx]

## Sheet: Figure 2H
	Cystine uptake
	Fluorescence Intensity (a.u.)
	JIMT1	SKBR3
	15266	4269
	18085	3008
	16406	6625

## Sheet: Figure 2I
	Cysteine amount
	Cysteine (umol/106 cells)
	JIMT1	SKBR3
	0.55	0.3
	0.75	0.3
	0.67	0.2

## Sheet: Figure 2J
	GSH/GSSG ratio
	GSH/GSSG
	JIMT1	SKBR3
	1.41958	6.23606
	1.43341	7.79591
	1.3065	6.25805
