# Supplementary material for: Targeting SLC7A11-mediated cysteine metabolism for the treatment of trastuzumab-resistant HER2-positive breast cancer
Source: eLife. 2025 Jun 4;14:RP103953. doi: 10.7554/eLife.103953 (PMC12136593; doi:10.7554/eLife.103953)
Supplement: Figure 3—figure supplement 1—source data 3. [file elife-103953-fig3-figsupp1-data3.xlsx]

## Sheet: Figure 3-figure supplement 1A
	SKBR3
	Oxidation Percentage (%)
	si-NC	si-SLC7A11-1	si-SLC7A11-2
	50.2	75.3	62.6
	57.9	71.3	63.6
	51.7	63.5	64.4

## Sheet: Figure 3-figure supplement 1B
	SKBR3
	Oxidation Percentage (%)
	si-NC	si-GPX4-1	si-GPX4-2
	43.5	64.4	76.7
	51.3	63.9	62.4
	53.1	65.5	65.2

## Sheet: Figure 3-figure supplement 1C
	Erastin
	Concentration	JIMT1			SKBR3
	1	101.061	94.6498	90.1661	95.4447	92.3307	93.2962
	2	93.231	86.9025	85.0253	84.5798	89.7063	89.108
	5	84.3466	65.6823	76.3899	80.174	85.8172	84.3758
	10	70.2816	58.0433	62.2311	77.1961	83.7639	80.3916
	20	67.8123	54.1011	55.6173	73.0759	80.2148	74.2181
	40	54.5487	46.3538	42.509	68.6157	76.8969	71.2809
	60	46.1516	41.3791	38.0505	64.0468	71.4577	63.0677
	80	38.4982	36.3747	33.2924	61.2048	66.6168	61.0144
	100	31.2729	29.1624	30.9025	55.1673	61.3544	52.9916

## Sheet: Figure 3-figure supplement 1D
	RSL3
	Concentration	JIMT1			SKBR3
	0.02	91.5673	93.915	86.7767	98.6622	95.5984	96.1358
	0.05	86.4594	91.9162	85.1777	96.7117	92.173	91.6104
	0.1	83.7627	84.4733	84.7399	93.2983	90.7977	88.6847
	0.2	78.2259	76.4924	79.5876	91.6099	88.4841	86.884
	0.5	72.3553	70.4886	75.9759	88.109	85.946	84.3829
	1	68.3604	63.9721	67.5888	85.1328	82.1325	81.9442
	2	60.4556	58.7754	59.3591	81.032	79.9192	78.7172
	5	46.9797	45.1079	46.7627	67.3431	65.8932	62.8545
	10	32.5127	37.4835	38.6853	58.1328	54.7325	52.9442

## Sheet: Figure 3-figure supplement 1E
	Time(hours)	JIMT1					SKBR3
	0	100	100	100	100	100	100	100	100	100	100
	12	93.6733	94.9885	94.1184	93.6395	91.2114	78.552	84.3249	75.1046	71.5627	76.6424
	24	87.677	87.2926	86.9216	86.8407	89.1339	64.2899	67.9893	67.2835	64.6428	65.0587
	36	85.6064	85.0668	83.7785	85.0196	83.7987	61.0316	60.603	59.2039	62.6197	62.1345
	48	84.2979	83.7785	82.9556	83.502	79.8327	57.2313	58.9077	56.7271	54.7293	53.1789
	60	78.8749	78.7738	66.5385	74.4166	76.8919	42.4965	49.6307	46.5489	51.8365	51.8743

## Sheet: Figure 3-figure supplement 1G
	JIMT1
	Oxidation Percentage (%)
	DMSO	Erastin	Erastin+Fer-1	RSL3	RSL3+Fer-1
	41.59	83.99	60.9	77.07	45.63
	48.05	85.86	65.79	77.16	40.76
	44.79	89.99	67.68	66.02	33.44
	SKBR3
	Oxidation Percentage (%)
	DMSO	Erastin	Erastin+Fer-1	RSL3	RSL3+Fer-1
	50.66	65.08	58.02	64.82	46.6
	56.45	65.21	56.52	68.89	45.11
	49.53	64.43	50.34	67.42	55.51

## Sheet: Figure 3-figure supplement 1H
	JIMT1
	Oxidation Percentage (%)
	DMSO	Cys	Cys+Fer-1
	48.3	71.92	48.25
	50.75	71.52	53.48
	45.93	65.58	44.54
	SKBR3
	Oxidation Percentage (%)
	DMSO	Cys	Cys+Fer-1
	42.99	75.92	52.84
	45.92	72.91	49.08
	41.96	67.88	47.14
