# Supplementary material for: Targeting SLC7A11-mediated cysteine metabolism for the treatment of trastuzumab-resistant HER2-positive breast cancer
Source: eLife. 2025 Jun 4;14:RP103953. doi: 10.7554/eLife.103953 (PMC12136593; doi:10.7554/eLife.103953)
Supplement: Figure 3—source data 3. [file elife-103953-fig3-data3.xlsx]

## Sheet: Figure 3A
	JIMT1
	Oxidation Percentage (%)
	si-NC	si-SLC7A11-1	si-SLC7A11-2
	57.9	79.2	69.3
	53.5	82.4	63.1
	55.4	77.9	78.6

## Sheet: Figure 3B
	JIMT1
	Oxidation Percentage (%)
	si-NC	si-GPX4-1	si-GPX4-2
	50.9	75.2	83.3
	58.6	71.1	75.4
	52.3	77	86.7

## Sheet: Figure 3C
	JIMT1
	Oxidation Percentage (%)
	DMSO	Erastin	RSL3	Cys
	30.88	80.83	86.63	66.04
	40.17	71.04	78.89	70.37
	46.52	75.06	84.36	68.41

## Sheet: Figure 3D
	SKBR3
	Oxidation Percentage (%)
	DMSO	Erastin	RSL3	Cys
	30.88	35.77	42.43	60
	25.41	37.2	35.14	60.69
	28.74	39.17	36.54	58.44

## Sheet: Figure 3E
	Erastin
	Oxidation Percentage (%)
	JIMT1	SKBR3
	20.57	4.89
	18.45	6.32
	21.39	3.51

## Sheet: Figure 3G
	RSL3
	Oxidation Percentage (%)
	JIMT1	SKBR3
	20.77	4.26
	16.22	5.1
	17.44	5.53

## Sheet: Figure 3H
	Cysteine starvation
	Oxidation Percentage (%)
	JIMT1	SKBR3
	21.81	29.12
	21.68	29.81
	18.83	26.45

## Sheet: Figure 3J
	JIMT1
	Fluorescence Intensity (a.u.)
Time	0h	24h	48h	72h
	23700	22591	16234	19328
	23145	21155	17861	17728
	23898	24614	15990	21476

## Sheet: Figure 3K
	JIMT1
	Oxidation Percentage (%)
	DMSO	H	Erastin	Cys	H+Cys	H+Erastin
	47.2	42.3	57.3	56.3	68.5	83.6
	45.7	42	65.5	59.5	69.6	84.5
	47.9	46	64.3	62.9	68.7	81.6
