# Supplementary material for: Targeting SLC7A11-mediated cysteine metabolism for the treatment of trastuzumab-resistant HER2-positive breast cancer
Source: eLife. 2025 Jun 4;14:RP103953. doi: 10.7554/eLife.103953 (PMC12136593; doi:10.7554/eLife.103953)
Supplement: Figure 4—figure supplement 1—source data 1. [file elife-103953-fig4-figsupp1-data1.xlsx]

## Sheet: Figure 4-figure supplement 1A
	Tumor Weight (g)
	DMSO	H	Erastin	Cys	H+Cys	H+Erastin
	0.95	0.591	0.291	0.68	0.401	0.401
	0.526	0.505	0.199	0.438	0.403	0.316
	0.531	0.398	0.376	0.449	0.218	0.439
	0.441	0.638	0.516	0.182	0.245	0.257
	0.777		0.474	0.779	0.081	0.154

## Sheet: Figure 4-figure supplement 1D
	CD49b+ NK cells
	DMSO	H	Erastin	Cys	H+Cys	H+Erastin
	6.67	8.53	4.1	6.3	8.72	5.47
	5.81	5.55	4.04	7.82	7.4	5.88
	6.63	9.17	4.92	7.11	8.05	5.26
	6.37	4.95	4.42	5.83	4.92	4.23
	6.26		7.21	6.4	7.01	4.32

## Sheet: Figure 4-figure supplement 1E
	NKp46+ NK cells
	DMSO	H	Erastin	Cys	H+Cys	H+Erastin
	82.17	80.82	71.03	70.59	87.41	78.72
	81.29	76.45	74.72	85.43	84.53	81.36
	79.84	80.86	78.17	85.58	86.01	69.03
	86	76.51	71.15	84.1	74.21	65.91
	80.15		72.01	80.24	81.03	71.22

## Sheet: Figure 4-figure supplement 1F
	Granzyme B+ NK cells
	DMSO	H	Erastin	Cys	H+Cys	H+Erastin
	0.31	0.41	0.25	0.16	0.2	0.21
	0.36	0.41	0.33	0.27	0.05	0.34
	0.23	0.59	0.23	0.22	0.12	0.38
	0.36	0.23	0.38	0.19	0.34	0.22
	0.45		0.37	0.14	0.65	0.41

## Sheet: Figure 4-figure supplement 1G
	NK cell maturation
		DMSO					H					Erastin					Cys					H+Cys					H+Erastin
	CD11b-CD27-	39.89	42.46	35.73	65.2	52.03	39.57	42.38	49.13	60.68		49.82	40.96	45.51	44.77	47.64	46.23	48.12	74.2	48.87	54.32	46.89	48.43	51.44	46.05	45.09	51.51	54.82	37.19	45.68	52.15
	CD11b-CD27+	23.82	15.31	25.55	17.31	27.91	19.94	21.29	19.05	22.25		27.29	27.12	28.11	23.65	26.42	18.58	19.33	22	24.94	18.35	21.99	18.24	15.09	16.93	21.16	14.96	20.42	26.38	16.25	26.31
	CD11b+CD27+	5.81	3.3	6.67	1.65	3.58	6.85	4.14	4.27	1.98		2.91	5.6	3.47	3.49	3.6	2.89	4.35	0.76	2.98	3.47	3.43	3.41	2.87	3.21	5.06	3.05	2.75	4.71	2.92	3.39
	CD11b+CD27-	30.48	38.93	32.05	15.84	16.48	33.64	32.18	27.55	15.09		19.98	26.32	22.91	28.1	22.34	32.3	28.2	3.04	23.22	23.87	27.7	29.92	30.61	33.82	28.69	30.48	22.01	31.73	35.15	18.15
