# Supplementary material for: Targeting SLC7A11-mediated cysteine metabolism for the treatment of trastuzumab-resistant HER2-positive breast cancer
Source: eLife. 2025 Jun 4;14:RP103953. doi: 10.7554/eLife.103953 (PMC12136593; doi:10.7554/eLife.103953)
Supplement: Figure 4—source data 1. [file elife-103953-fig4-data1.xlsx]

## Sheet: Figure 4C
	Fold Change of Tumor Volume
	Days	NC					H					Cys					Cys+H					Erastin					Erastin+H
	0	1	1	1	1	1	1	1	1	1		1	1	1	1	1	1	1	1	1	1	1	1	1	1	1	1	1	1	1	1
	2	2.29899	1.61031	3.82531	2.44958	1.7065	1.48882	2.09117	1.39285	1.27647		1.35312	1.66673	3.30478	4.57373	2.42628	0.807056	1.34004	1.38961	1.11845	1.37356	1.21966	1.49404	1.42924	1.44375	0.971008	1.16725	0.964087	1.11641	1.01073	1.07142
	4	2.3156	1.97914	4.85254	1.52333	1.74236	1.65983	2.35706	1.42782	1.44844		1.46992	1.45892	3.28389	4.67612	2.91722	0.562203	1.81396	1.76633	1.05479	1.19031	1.31455	1.85017	1.46305	1.75493	1.26365	1.19916	1.55609	1.51041	0.877683	1.3953
	6	3.45059	1.70289	3.41309	2.73679	1.81788	2.35006	2.83557	1.50174	2.36264		1.71361	1.75914	3.64694	6.13366	1.81202	0.67419	1.58833	1.68699	1.01699	1.01824	1.56072	1.62965	1.32675	1.65081	1.37731	1.4931	0.958676	1.295	0.95526	1.19424
	8	5.31771	1.79326	3.36907	1.7261	2.52332	3.27861	2.70085	2.33551	2.55274		1.75808	1.61306	3.6681	7.86532	1.39451	0.460983	1.70088	1.69978	1.23243	0.85021	1.46681	2.07586	1.28742	1.86438	1.91524	1.35309	0.848016	1.05701	1.01279	1.55349
	10	4.72874	2.72639	5.92036	2.804	1.99979	4.32125	2.13517	2.55412	2.84803		1.61594	1.79599	4.11117	9.4572	1.5548	0.460983	1.70088	1.69978	1.23243	0.85021	1.47317	2.07891	1.58238	2.1655	1.84476	1.33963	1.81068	0.995702	1.08185	1.38854
	12	6.75502	3.14804	6.16713	2.30391	2.79188	4.61379	3.24718	2.70282	3.5585		2.1497	2.04663	4.48211	9.43073	1.96935	0.606203	2.00679	2.18914	1.48131	0.92112	1.69261	1.86478	1.67614	2.2975	1.52726	1.5308	1.72518	1.05695	1.02558	1.62777
	14	9.52631	3.43693	6.03427	3.07138	3.60075	5.43445	3.64718	3.24134	3.80769		2.43008	2.38476	5.3872	10.353	2.03322	0.423966	1.83377	1.57776	1.22886	0.915681	1.6069	2.02152	1.80443	2.45649	1.84053	1.57493	1.7244	0.925503	1.05138	1.60633
	16	8.74831	3.88275	6.71565	4.27516	3.88384	5.86092	4.39283	3.55632	4.15084		2.62957	3.42616	6.41851	9.92751	2.5996	0.478863	1.85413	1.79328	1.0311	0.883957	1.97864	2.67457	2.25836	2.80228	2.07349	1.57602	2.28137	1.05936	1.28422	1.7167
	18	11.2563	4.3523	7.42097	4.40285	4.59521	5.99256	4.63121	3.7561	4.48516		3.38814	4.0714	7.89197	12.2145	3.11332	0.788732	2.03386	2.06823	1.1022	1.04425	2.44754	2.87498	2.23762	2.75506	2.32921	2.14546	2.5537	1.13421	1.45043	2.02362
	20	12.3506	4.56815	7.77079	5.67305	5.31924	6.33948	5.4253	4.52096	5.47969		4.84107	5.23356	9.0011	13.547	4.6433	0.418246	1.81718	2.42943	1.09536	1.15613	2.71549	3.12615	2.99284	3.72836	3.10121	2.30546	2.03146	1.25313	1.78837	2.61003
	22	12.4509	4.93778	8.07996	6.02566	5.96815	6.93231	5.60329	4.77446	5.68433		5.98982	6.6741	9.99735	13.6142	5.11228	0.3584	1.87498	2.1834	1.01259	0.987051	3.07031	3.17952	3.21419	4.25063	3.24791	2.65526	1.91686	0.727846	1.58608	2.52612

## Sheet: Figure 4D
	Mouce Weight (g)
	Days	NC					H					Cys					Cys+H					Erastin					Erastin+H
	0	18.6	18.3	18.8	17.8	19.3	17.3	16.3	16.5	17.5		19.3	18	17.1	19.2	16.4	19	17.8	18.3	18.6	19.7	21.4	18.2	18.3	17.3	18.8	18.6	16.8	18.2	16.9	17.1
	2	18.4	18.7	18.6	18.1	19.4	17.3	17.7	17	18.1		19.3	17.6	18.5	19.4	17.4	18.9	19.1	18.8	18.5	19.7	20.9	18.6	18.5	17.6	18.7	19.3	17.5	18.7	17	17.8
	4	19.4	19.2	20.1	19.1	20.1	17.9	18.1	17.8	19		20.1	19.3	18.6	20.1	18.1	19.6	20	19.8	19	20	21.9	19.5	19.2	17.9	21	20.2	18.6	19.5	17.8	18.6
	6	19.6	19.6	20.5	19.5	20.4	18.7	18.9	18.1	19.5		20.7	19.4	17.8	19.8	17.8	19.5	20.4	20	19.6	20.2	21.9	19.3	19.2	18	20.4	20.4	18.8	19.7	18.7	18.6
	8	19.1	19.2	19.4	18.9	19.9	17.8	18	17.4	18.9		20.1	18.9	17.5	19.4	17.4	19.4	20.6	19.7	19.1	20.4	21.4	17.5	18.3	16.7	19.4	19.5	18.1	18.9	18.3	18.4
	10	19.5	20.2	19.7	18.7	19.9	16.4	18.2	17.8	18.1		19.9	18.8	16.8	19.4	17.6	20	20.5	20	19.1	19.6	21.2	18.4	18.4	18.7	19.5	18.5	17.5	18.9	17.4	18.2
	12	19.6	19.6	20	19.3	20.5	17.2	18.5	18	19.3		20.4	19.4	17.5	19.2	17.2	19.9	20.4	20.1	19.1	20.5	21.6	19.5	19.1	17.9	20	19.6	17.8	19.3	17.9	18.2
	14	20	19.8	20.3	19.7	20	17.7	18.5	17.8	19		21	19.5	17.4	19.7	17.7	20.8	21	20.3	19.4	20.9	21.6	19.6	19.3	18.3	20.4	20.6	18.2	20	18	19
	16	20.5	20	20.2	19.6	20	18.7	19.1	18.3	19.1		20.2	18.5	17.4	19	17.7	19.4	20.3	19.7	18.8	20.7	22.1	20	19.3	18.3	20.4	21	18.1	20.3	18.6	18.8
	18	21.1	21.2	22.1	21	21.4	19.3	19.5	19	19.6		20.8	18.8	18.9	19.8	18.5	21	21.6	20.9	19.8	21.7	23.2	20.4	19.9	19.3	21.3	21.9	19	21.3	19.5	20
	20	20.7	20.7	21.2	20.1	20.7	18.9	19.4	18.4	19.1		20.9	18.5	19	19.5	18.1	19.9	20.8	20.1	19.2	20.9	22	19.8	19.5	18.7	21	21.3	18.8	20.6	19.1	20.1
	22	20.8	21.6	21.1	20.7	21.2	19.4	20.6	19	19.8		21.6	19.5	19.2	20.2	19	20.7	21.3	21	20	21.7	23.1	20.3	19.3	19.2	21.5	21.9	19.6	20.6	19.9	21.2

## Sheet: Figure 4E
	CD49b+ NK cells
	DMSO	H	Erastin	Cys	H+Cys	H+Erastin
	1.58	1.55	1.18	1.2	4.86	1.25
	1.02	1.07	0.97	2.81	3.22	2.35
	2.82	0.21	0.84	1.83	4.12	1.85
	0.6	0.11	0.65	1.32	2.24	1.13
	2.22		0.69	0.63	3.76	1.4

## Sheet: Figure 4F
	NKp46+ NK cells
	DMSO	H	Erastin	Cys	H+Cys	H+Erastin
	3.99	2.31	58.92	30.12	24.66	10.28
	9.79	2.39	64.95	9.66	50.44	73.17
	39	6.06	40.57	36.7	30.97	18.87
	72.28	44.44	39.44	31.45	18.88	40.91
	15.51		25	20.59	9.45	20.34

## Sheet: Figure 4G
	Granzyme B+ NK cells
	DMSO	H	Erastin	Cys	H+Cys	H+Erastin
	5.32	12.31	4.71	6.43	6.58	4.36
	10.08	8.22	5.61	6.6	6.16	1.5
	3.84	3.03	4	6.65	5.04	1.47
	6.79	0	4.93	4.24	5.58	9.09
	7.91		7.24	7.35	26.5	4.75

## Sheet: Figure 4H
	NK cell maturation	DMSO					H					Erastin					Cys					H+Cys					H+Erastin
	CD11b-CD27-	24.42	35.88	6.13	8.63	24.41	17.12	8.75	68.18	22.22		14.48	12.15	22.86	16.2	5.26	4.82	18.68	12.07	26.15	33.82	28.14	10.41	39.14	41.85	10.8	11.53	2.63	28.43	15.91	24.07
	CD11b-CD27+	24.25	21.28	21.79	4.95	10.08	32.12	12.47	4.55	5.56		6.73	4.67	8.57	13.38	4.61	14.46	27.21	9.11	18.02	8.82	28.53	17.74	11.4	15.24	7.24	24.92	10.88	22.3	14.77	18.64
	CD11b+CD27+	48.5	35.69	69.13	82.46	62.35	48.62	78.51	7.58	50		69.36	37.85	60	57.75	71.05	78.71	51.53	75.86	51.59	43.38	42.36	68.62	45.98	39.48	75.34	61.68	85.74	48.28	67.05	56.61
	CD11b+CD27-	2.82	7.16	2.95	3.96	3.16	2.12	0.27	19.7	22.22		9.43	45.33	8.57	12.68	19.08	2.01	2.58	2.96	4.24	13.97	0.91	3.23	3.48	3.43	6.63	1.87	0.75	0.98	2.27	0.68
