# Supplementary material for: Targeting SLC7A11-mediated cysteine metabolism for the treatment of trastuzumab-resistant HER2-positive breast cancer
Source: eLife. 2025 Jun 4;14:RP103953. doi: 10.7554/eLife.103953 (PMC12136593; doi:10.7554/eLife.103953)
Supplement: Figure 5—source data 3. [file elife-103953-fig5-data3.xlsx]

## Sheet: Figure 5F
		input%			input%
		si-NC			si-ASH2L-1
	IgG	0.343216	0.63604	0.492157	0.504825	0.125335	0.302259
	H3K4me3	4.27875	4.55417	5.49146	1.93704	2.46888	2.26888

## Sheet: Figure 5G
	JIMT1
	Fluorescence Intensity (a.u.)
	si-NC	si-ASH2L-1
	12956	5108
	13749	4612
	13879	5169

## Sheet: Figure 5H
	JIMT1
	Oxidation Percentage (%)
	si-NC	si-ASH2L-1
	64.1	79.4
	60.6	73.9
	61	76
