# Supplementary material for: Targeting SLC7A11-mediated cysteine metabolism for the treatment of trastuzumab-resistant HER2-positive breast cancer
Source: eLife. 2025 Jun 4;14:RP103953. doi: 10.7554/eLife.103953 (PMC12136593; doi:10.7554/eLife.103953)
Supplement: Figure 6—source data 3. [file elife-103953-fig6-data3.xlsx]

## Sheet: Figure 6D
		input%			input%			input%
		DMSO			dCas9-DNMT3A			dCas9-DNMT3A+sgRNA1
	IgG	0.206375	0.25232	0.288225	0.282565	0.39191	0.10672	0.16532	0.12074	0.18754
	5mC	1.35215	1.50378	1.96168	1.56306	2.01661	1.95122	3.64821	3.51111	3.25888

## Sheet: Figure 6F
	JIMT1
	Fluorescence Intensity (a.u.)
	Control	dCas9-DNMT3A	dCas9-DNMT3A +sgRNA-1
	18720	16867	4952
	17252	15508	4021
	16893	16631	4999

## Sheet: Figure 6G
	JIMT1
	Oxidation Percentage (%)
	Control	dCas9-DNMT3A	dCas9-DNMT3A +sgRNA-1
	53.9	50.1	74.2
	54.2	62.6	76.3
	50.4	51.3	70.8
