# Supplementary figures and images for: Targeting SLC7A11-mediated cysteine metabolism for the treatment of trastuzumab-resistant HER2-positive breast cancer
Source: eLife journal article supplement (doi:10.7554/elife.103953), 2025-02-05

Trastuzumab

0h 24h 48h 72h

40 kDa

35 kDa

25 kDa

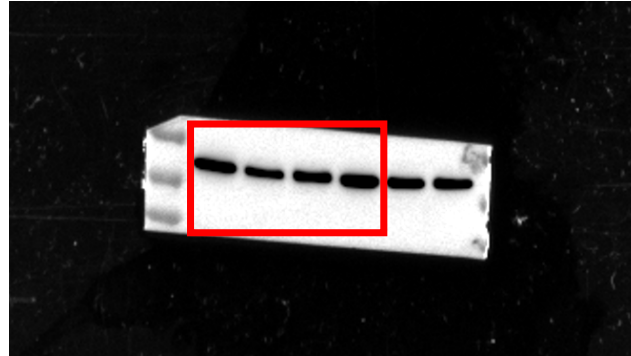

SLC7A11

40 kDa

35 kDa

25 kDa

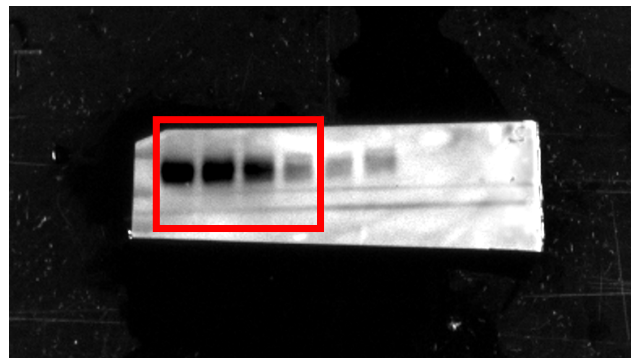

GAPDH

Supplement: fig3-data1 [file elife-103953-fig3-data1-v1.zip]

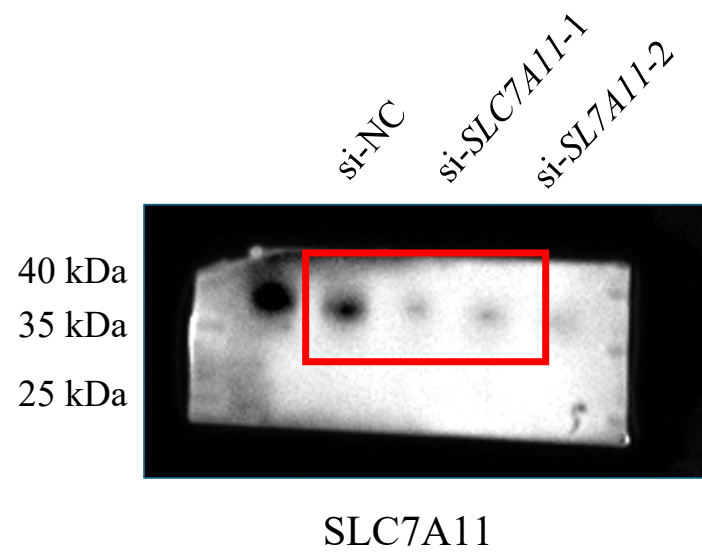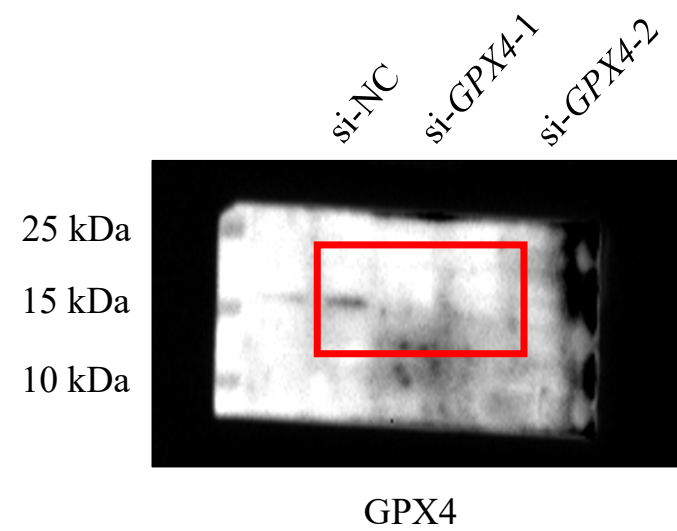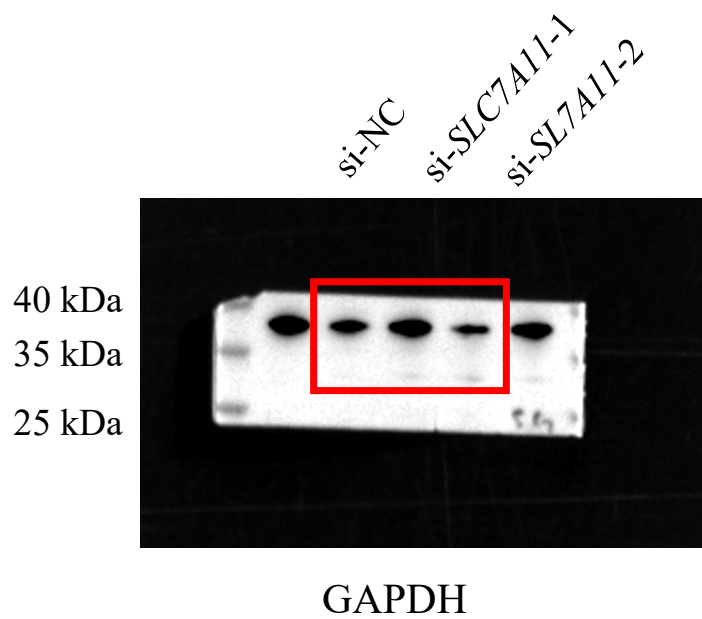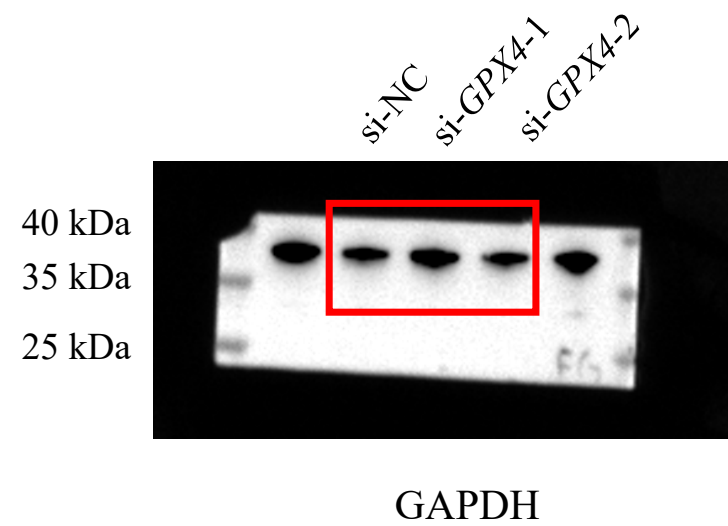

Supplement: fig3-data1 [file elife-103953-fig3-data1-v1.zip]

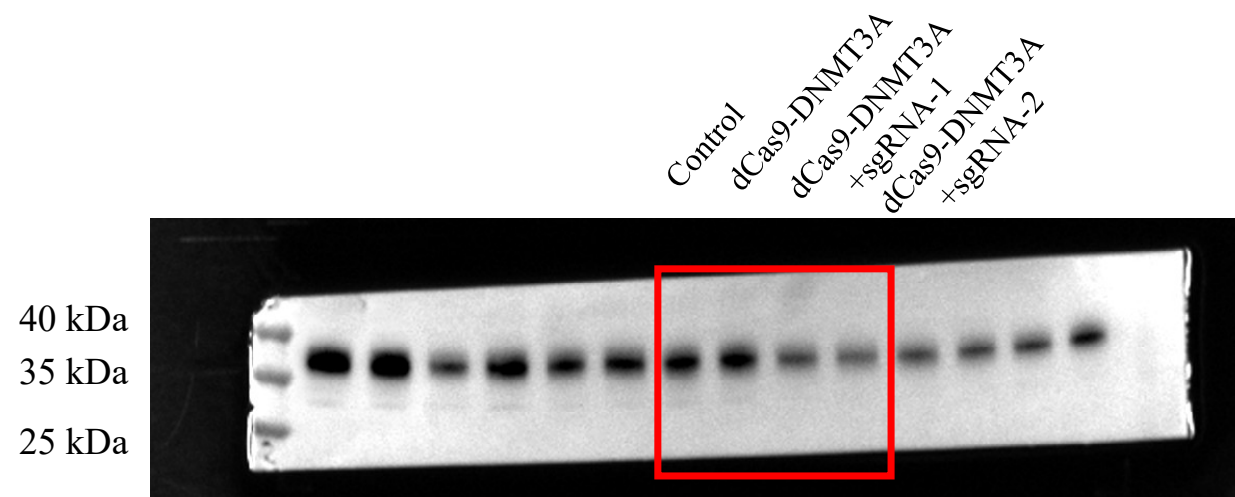

SLC7A11

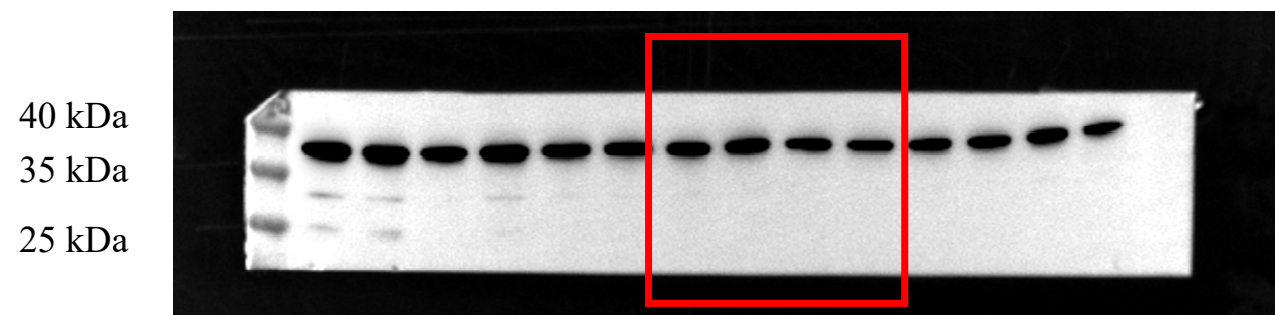

GAPDH

Supplement: fig6-data1 [file elife-103953-fig6-data1-v1.zip]
